# Supplementary material for: Synthesis of 2,4,5-triarylimidazoles in aqueous solution, under microwave irradiation
Source: Royal Society of Chemistry journal article supplement (doi:10.1039/b925177d), 2010-01-01

# Supporting information for publication

## Synthesis of 2,4,5-triarylimidazoles in aqueous solution, under microwave irradiation.

**Edouard Chauveau, Catherine Marestin, Frédéric Schiets,  
Régis Mercier**

*Laboratoire des Matériaux Organiques à Propriétés Spécifiques UMR  
5041 CNRS / Université de Savoie Chemin du canal, 69 360 Solaize –  
France*

*marestin@lmops.cnrs.fr*

## Table of Content

|                                                          |     |
|----------------------------------------------------------|-----|
| Temperature and pressure profiles during reactions       | P3  |
| HPLC UV chromatograms                                    | P6  |
| NMR spectra                                              | P8  |
| Synthesis and characterization of a benzoxazole compound | P18 |

## Temperature and pressure profiles during the reaction for the different syntheses

2-(4-methoxyphenyl)-4,5-diphenyl-1H-imidazole

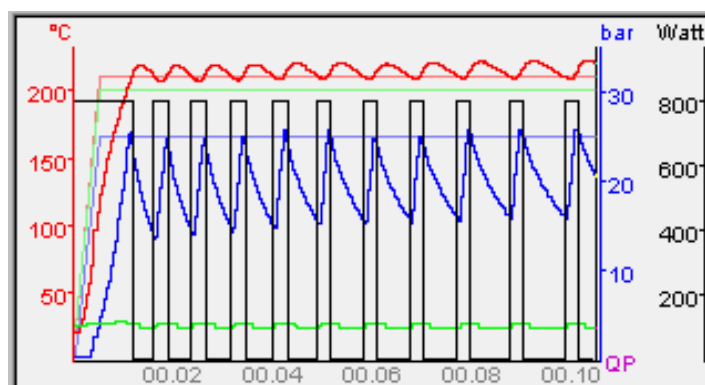

2-phenyl-4,5-diphenyl-1H-imidazole

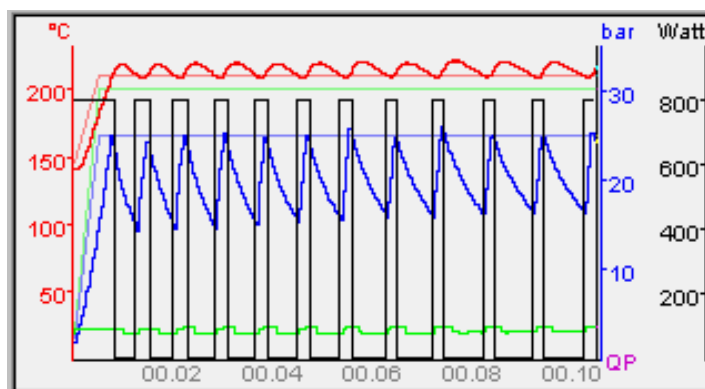

2-(4-Fluorophenyl)-4,5-diphenyl-1H-imidazole

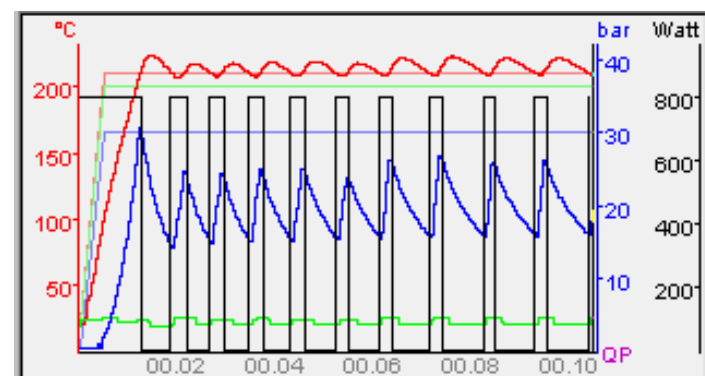

2-(4-Hydroxyphenyl)-4,5-diphenyl-1H-imidazole

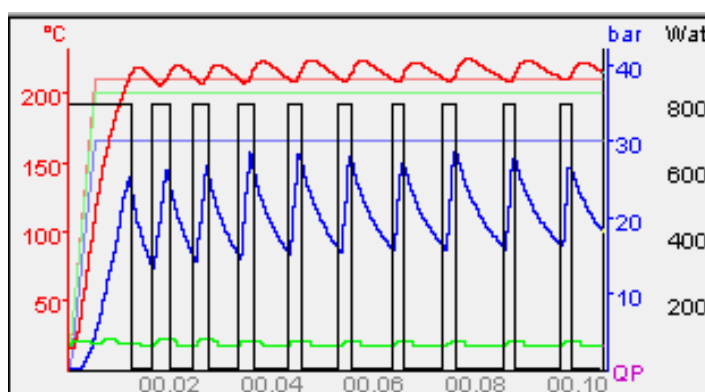

2-(4-Cyanophenyl)-4,5-diphenyl-1H-imidazole

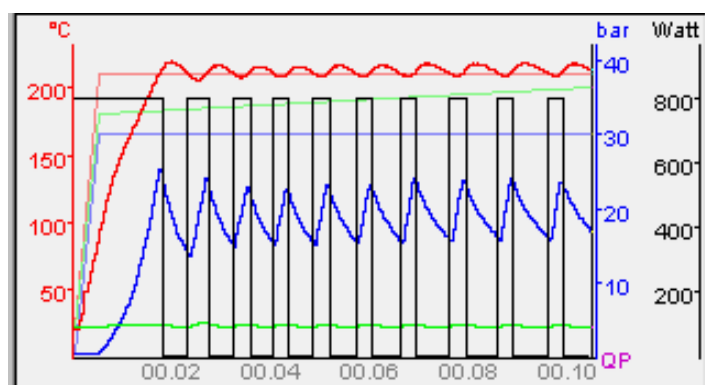

2-(3,4,5-trimethoxyphenyl)-4,5-diphenyl-1H-imidazole

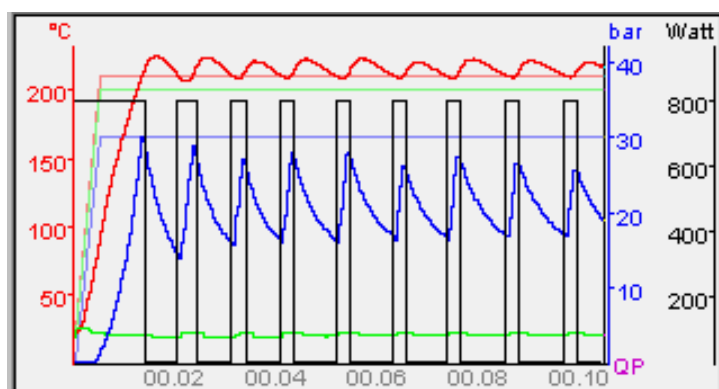

2-(naphthalene)-4,5-diphenyl-1H-imidazole

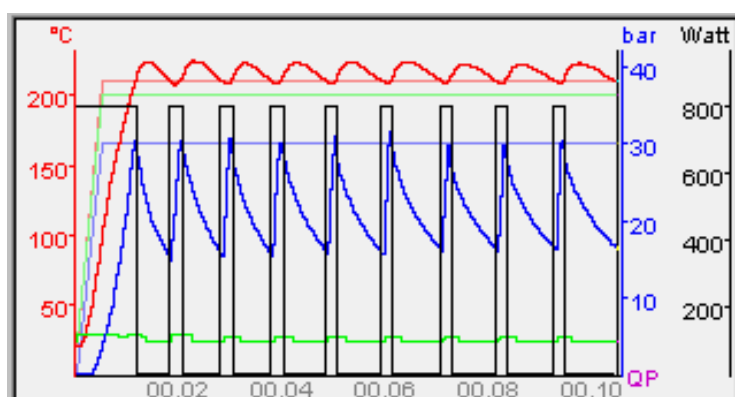

2-(anthracene)-4,5-diphenyl-1H-imidazole

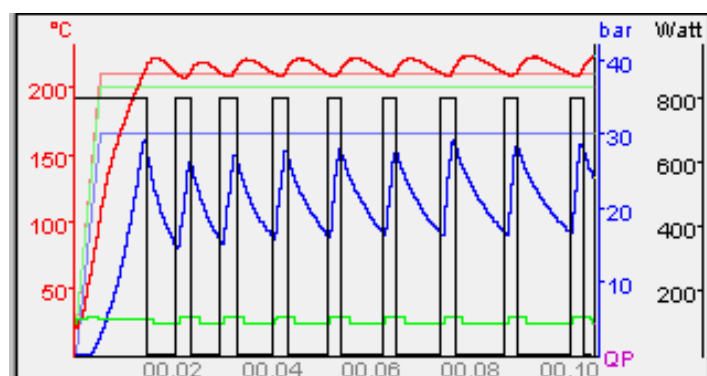

2-(3-methoxy, 4-hydroxyphenyl)-4,5-diphenyl-1H-imidazole

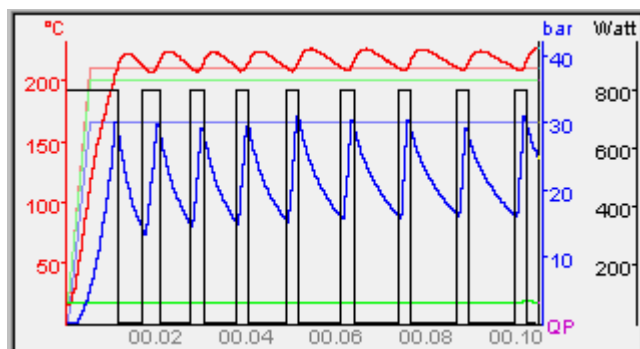

### **HPLC Chromatograms**

HPLC UV traces of the analytically pure compound (at 262nm).

2-(4-methoxyphenyl)-4,5-diphenyl-1H-imidazole:

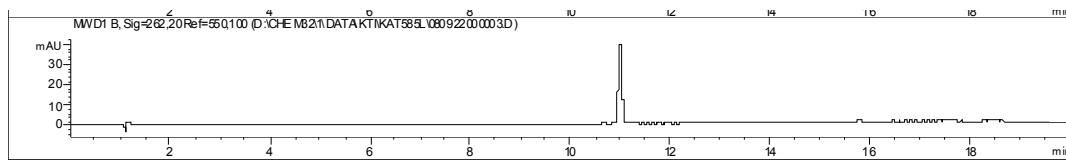

2-phenyl-4,5-diphenyl-1H-imidazole :

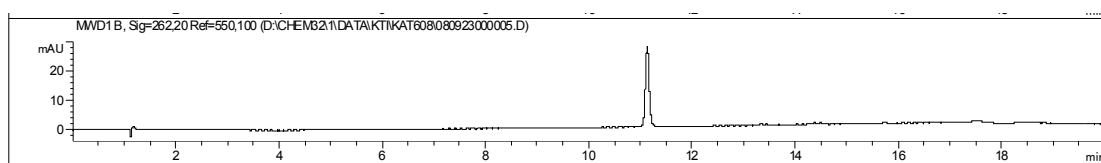

2-(4-Fluorophenyl)-4,5-diphenyl-1H-imidazole:

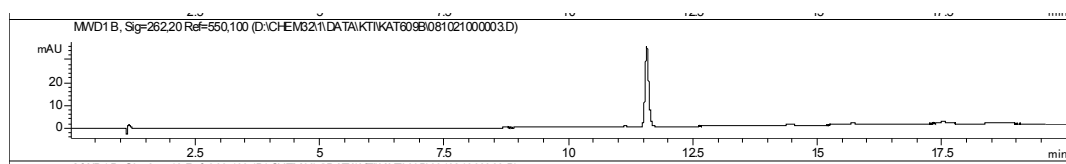

2-(4-Hydroxyphenyl)-4,5-diphenyl-1H-imidazole :

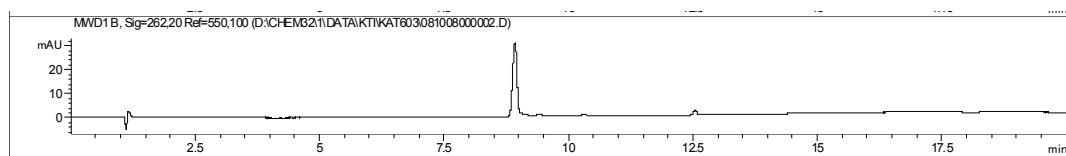

2-(4-Cyanophenyl)-4,5-diphenyl-1H-imidazole :

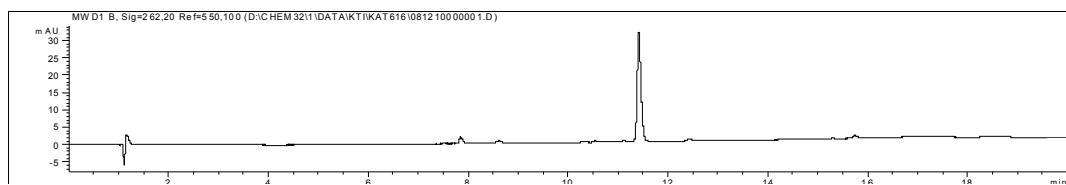

2-(3,4,5-trimethoxyphenyl)-4,5-diphenyl-1H-imidazole :

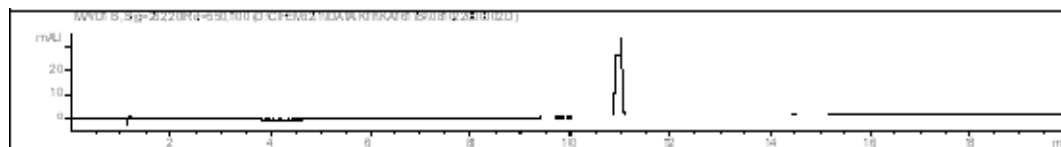

2-(naphthalene)-4,5-diphenyl-1H-imidazole :

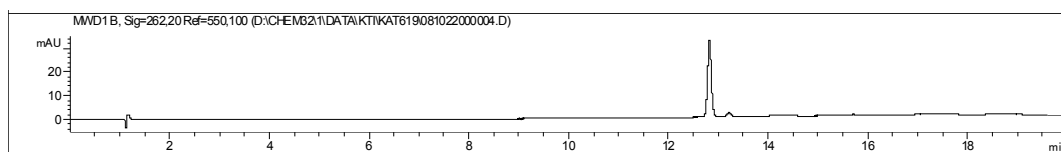

2-(anthracene)-4,5-diphenyl-1H-imidazole

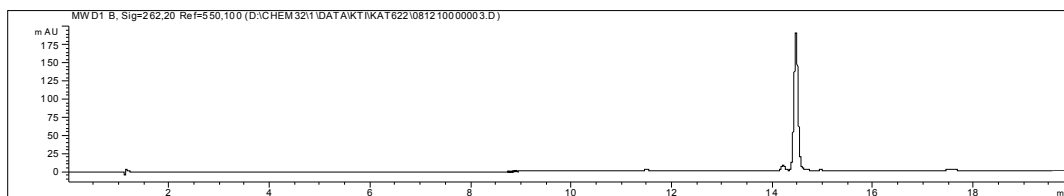

2-(3-methoxy, 4-hydroxyphenyl)-4,5-diphenyl-1H-imidazole

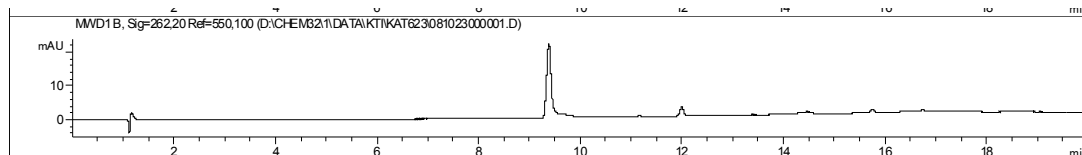

### $^1\text{H}$ and $^{13}\text{C}$ NMR characterizations

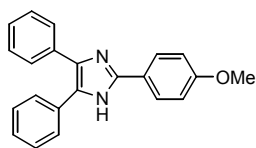

#### $^1\text{H}$ NMR

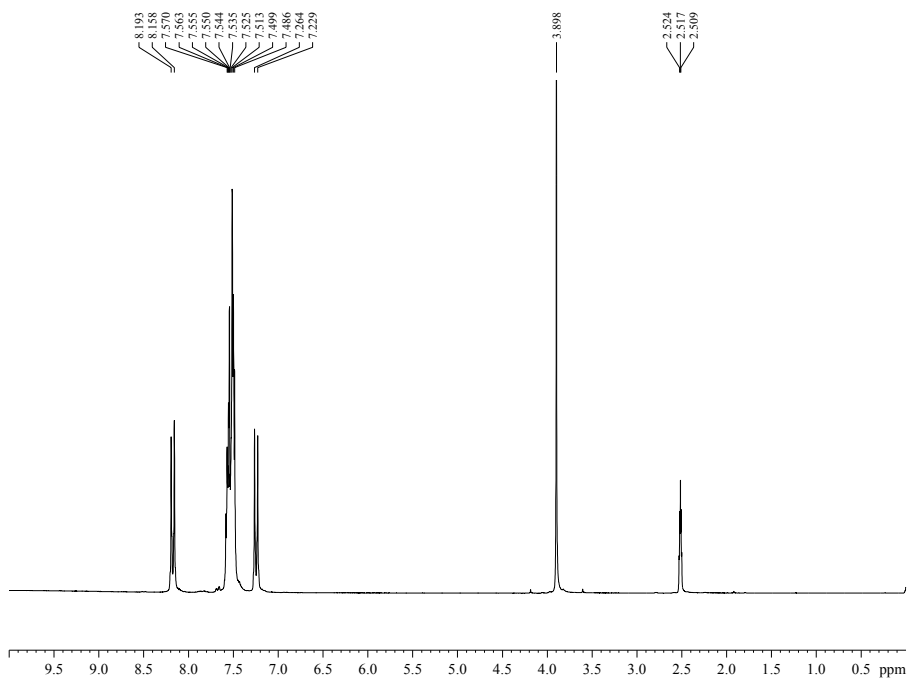

#### $^{13}\text{C}$ NMR

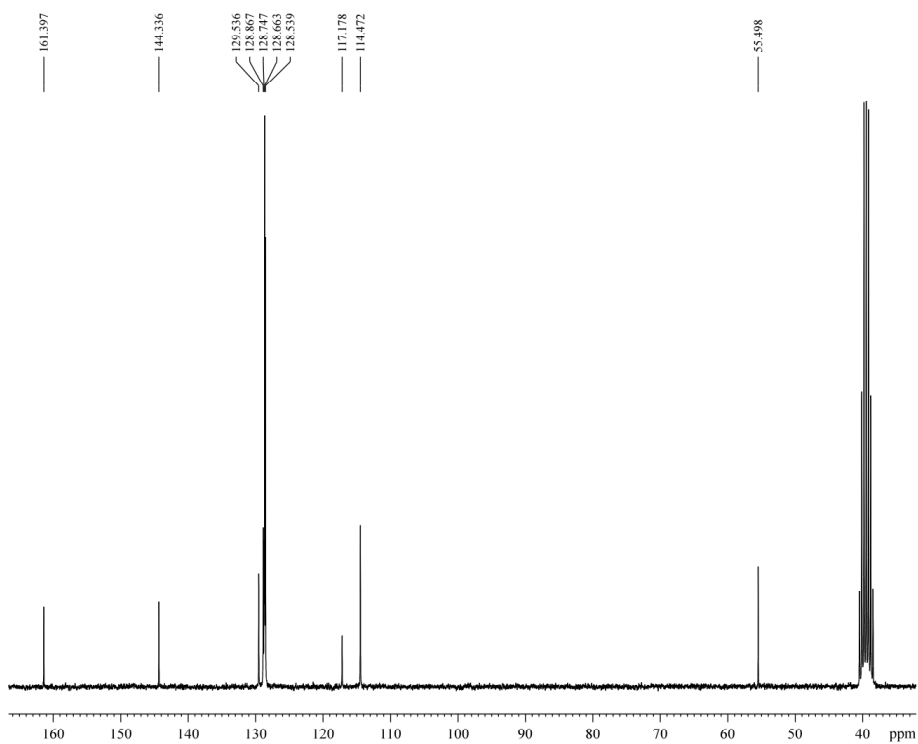



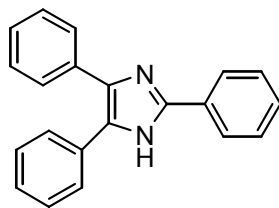

<sup>1</sup>H NMR

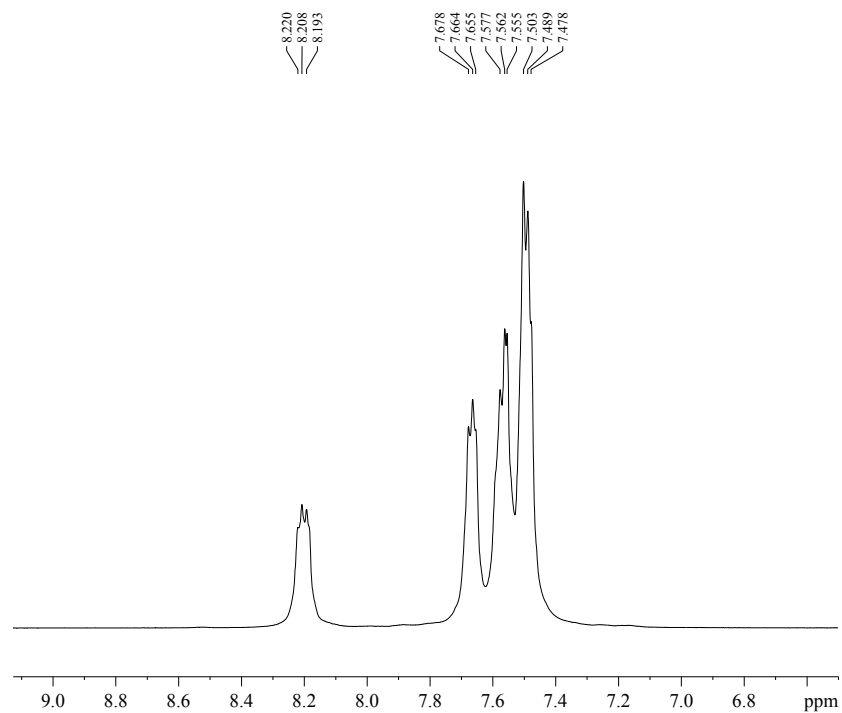

<sup>13</sup>C NMR

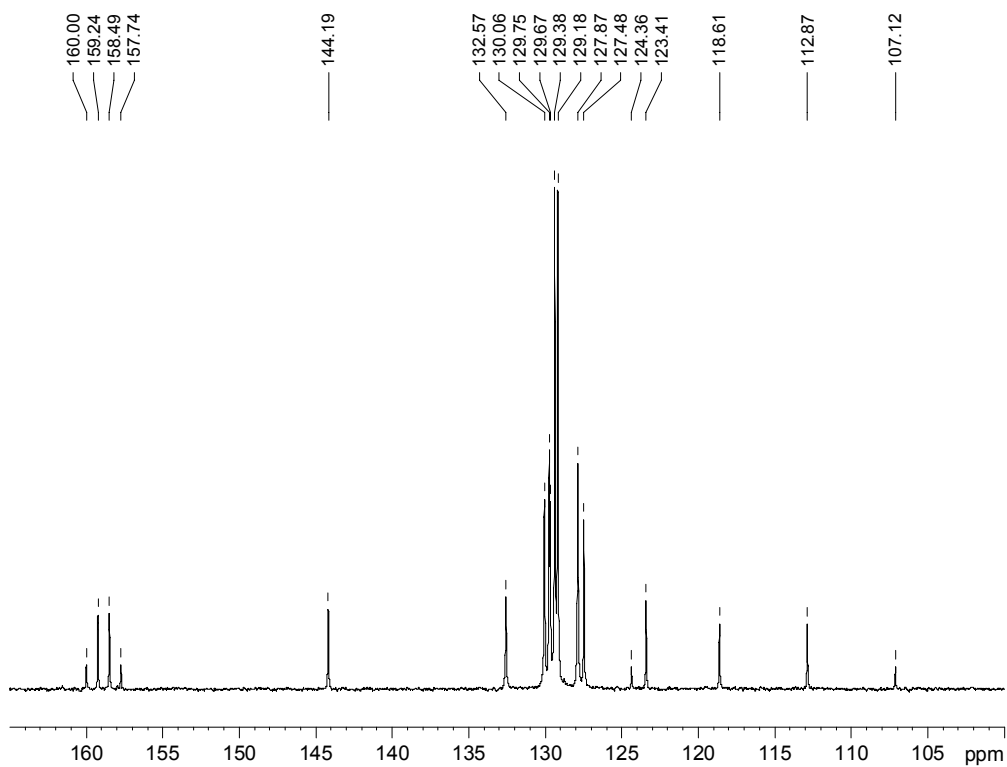

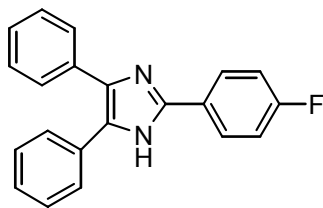

<sup>1</sup>H NMR

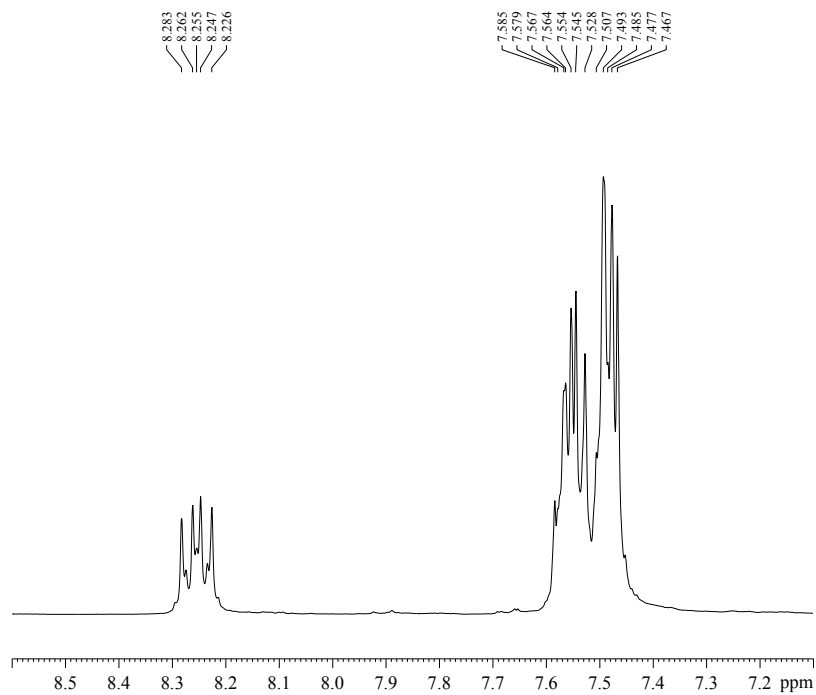

<sup>13</sup>C NMR

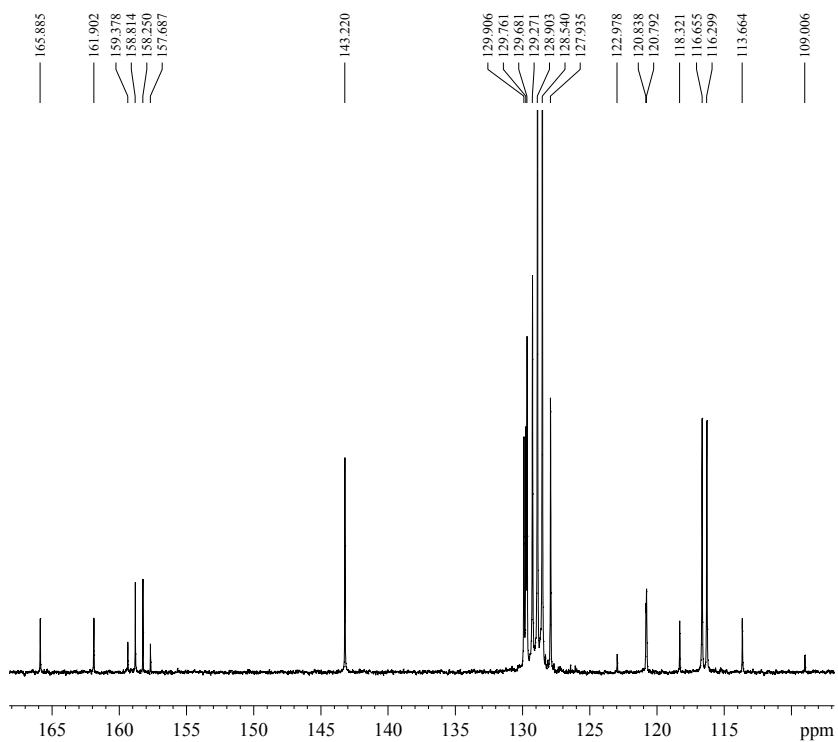

Zoom :

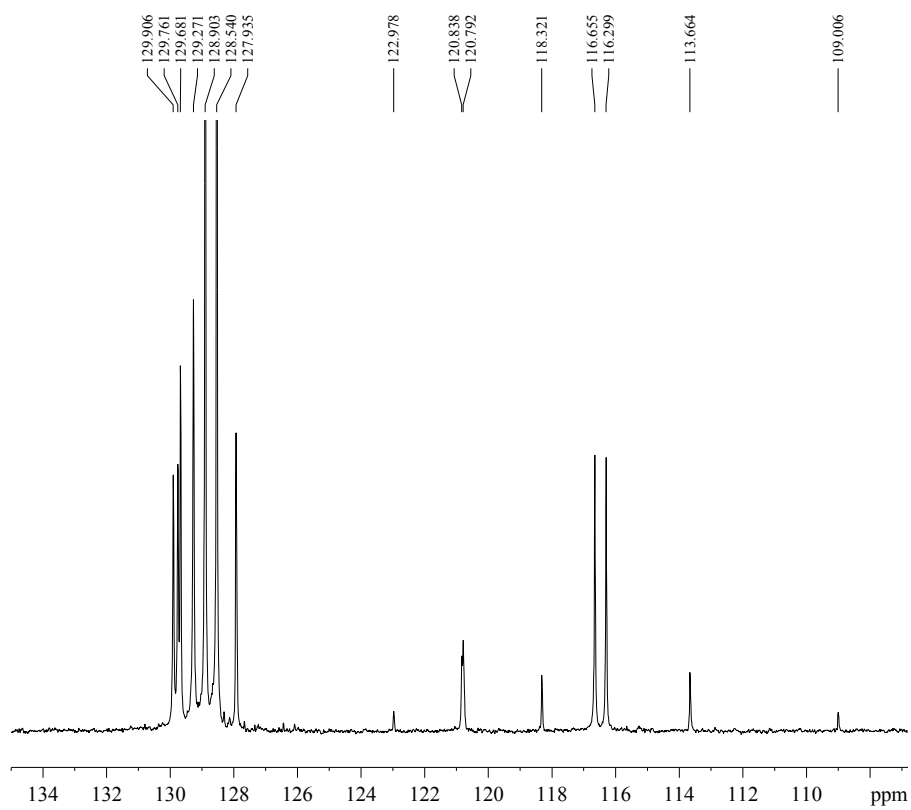

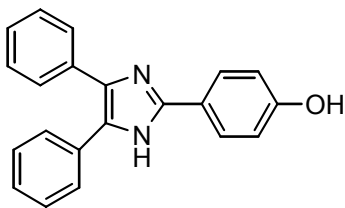

<sup>1</sup>H NMR

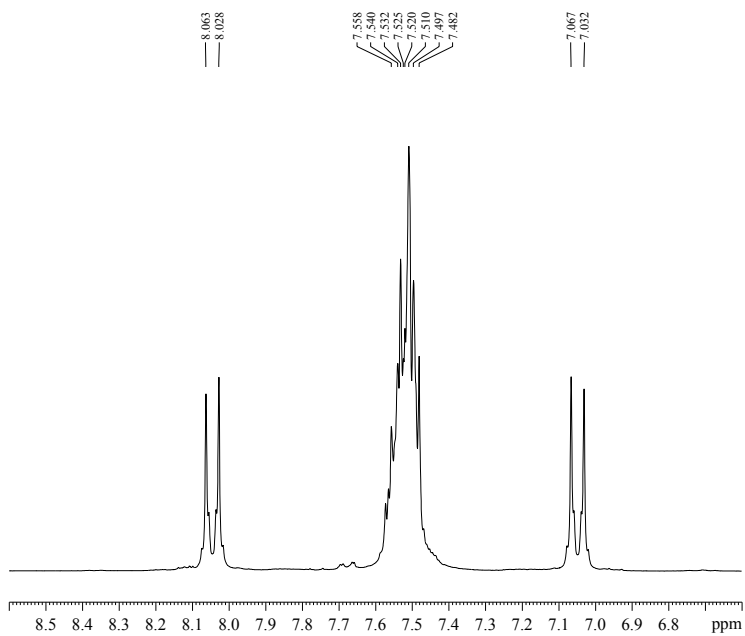

<sup>13</sup>C NMR

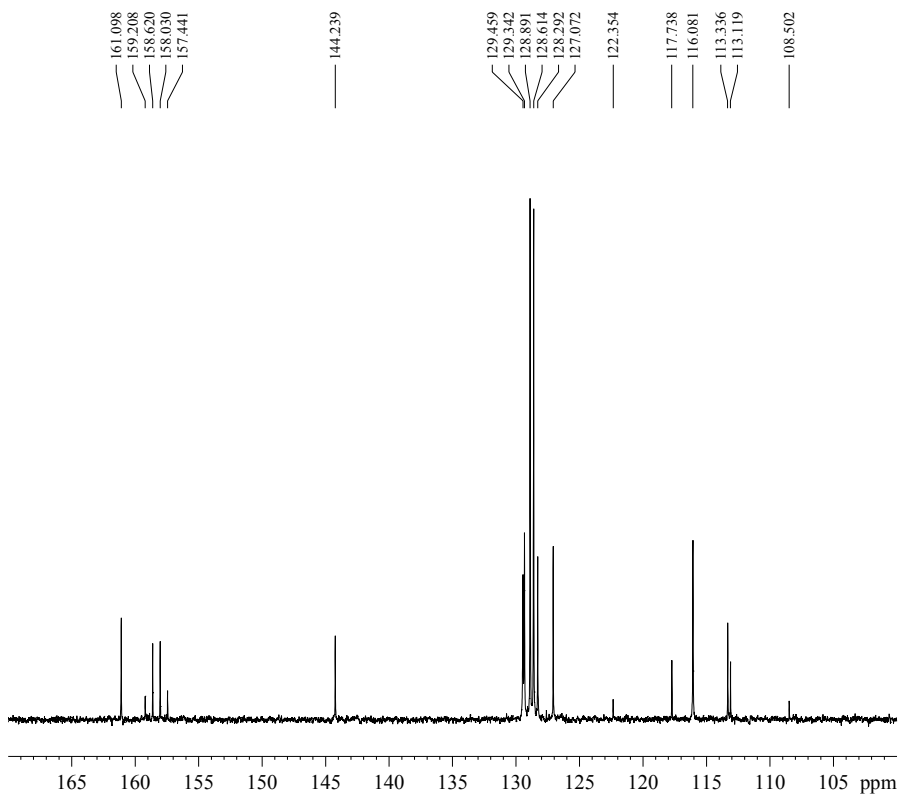

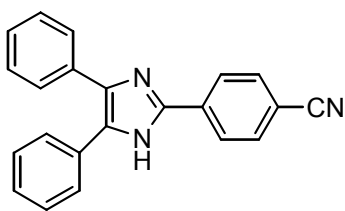

<sup>1</sup>H NMR

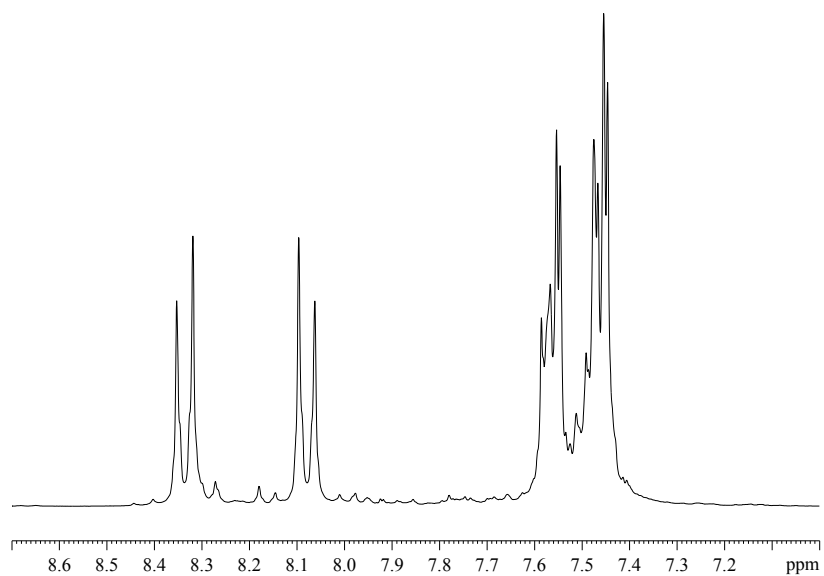

<sup>13</sup>C NMR

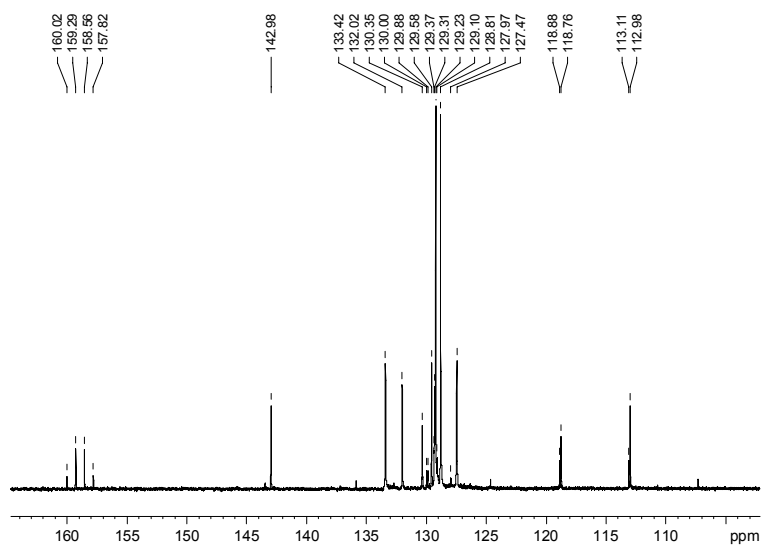

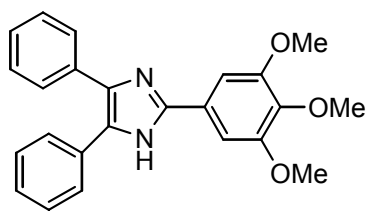

<sup>1</sup>H NMR

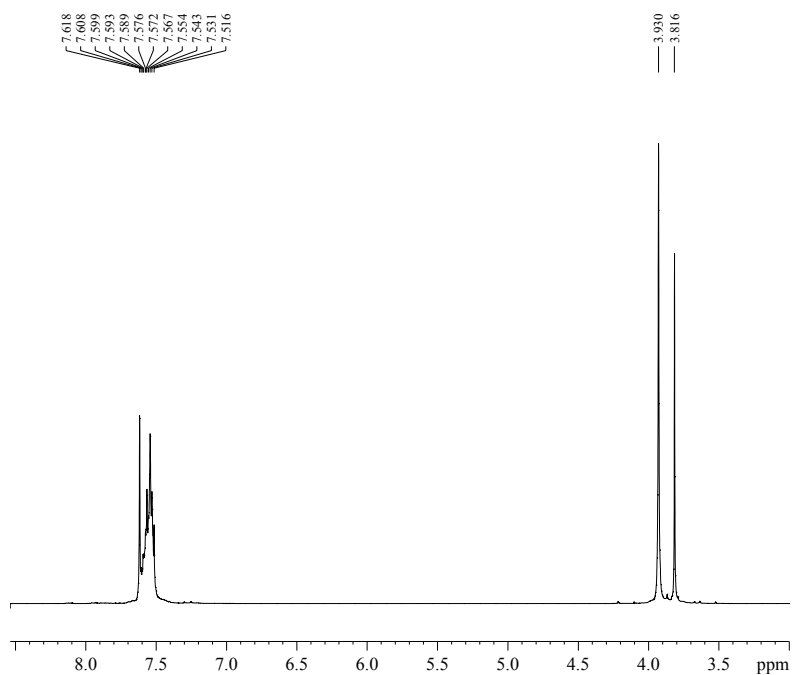

<sup>13</sup>C NMR

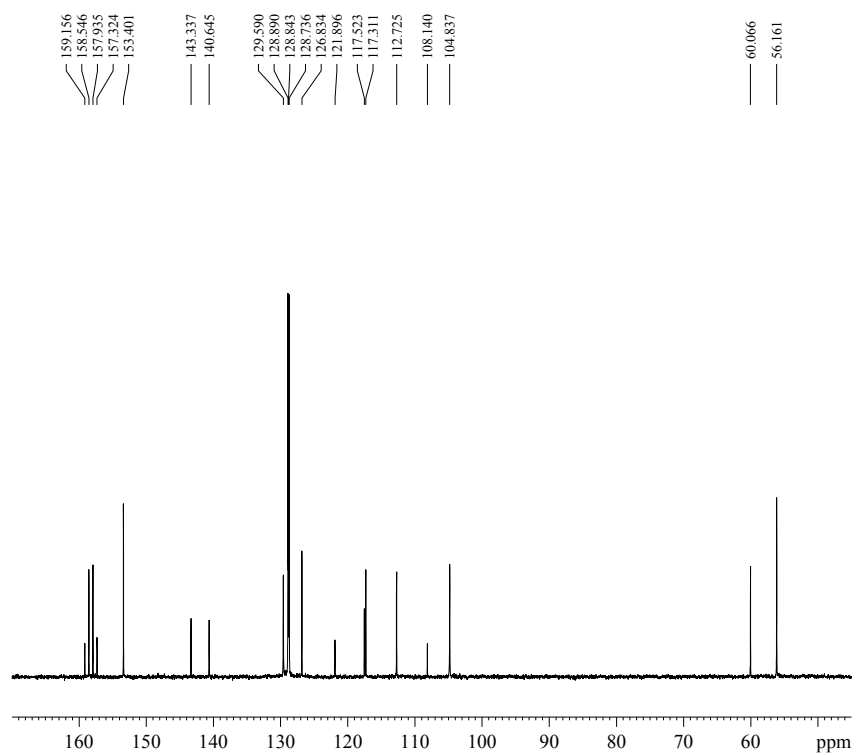

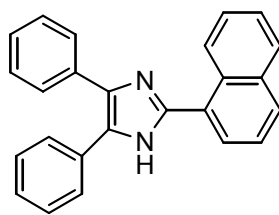

<sup>1</sup>H NMR

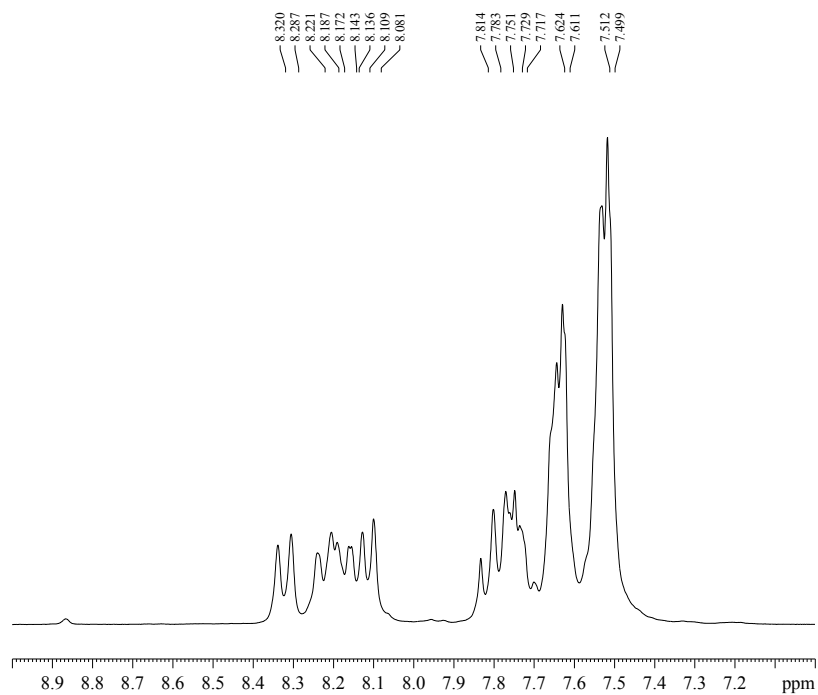

<sup>13</sup>C NMR

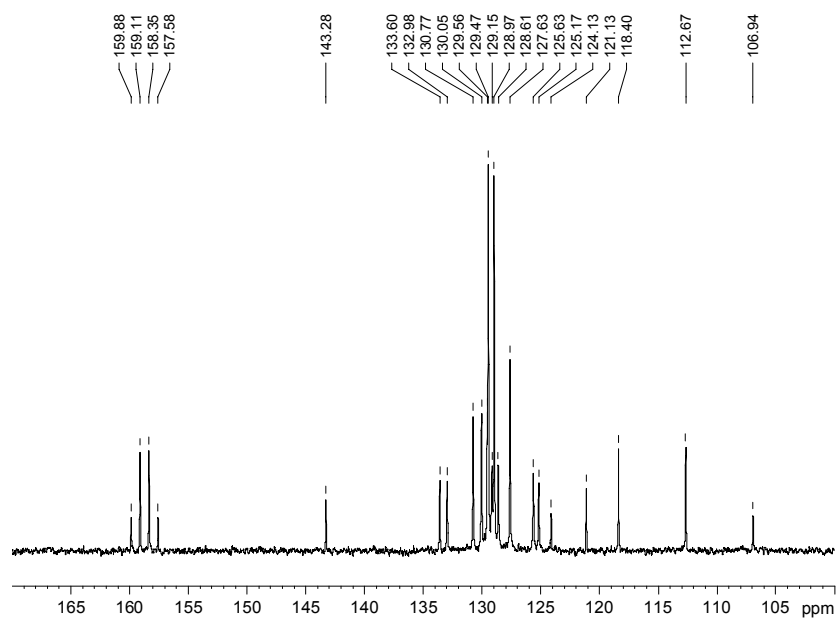

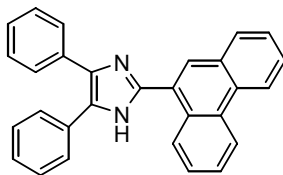

<sup>1</sup>H NMR

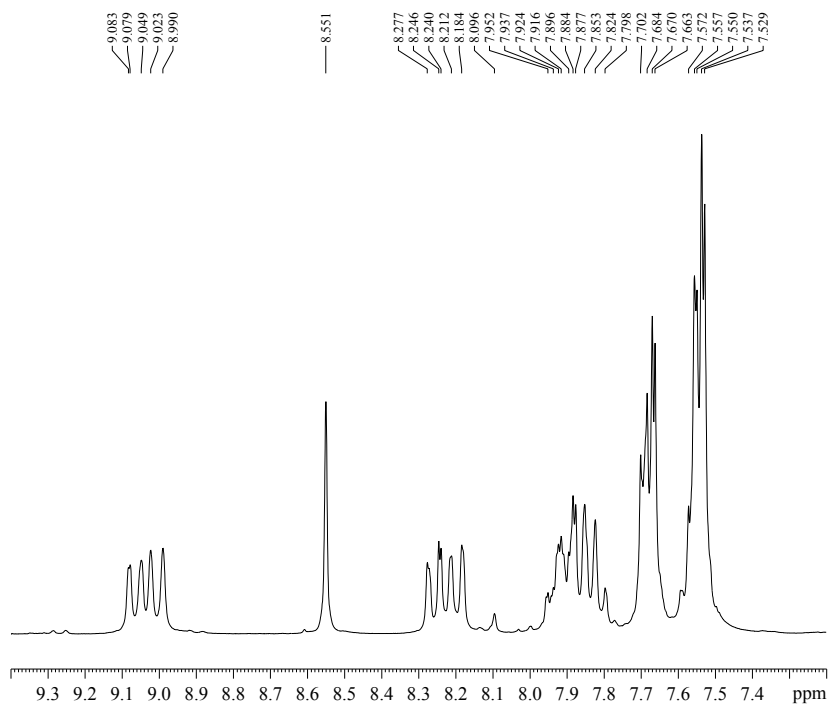

<sup>13</sup>C NMR

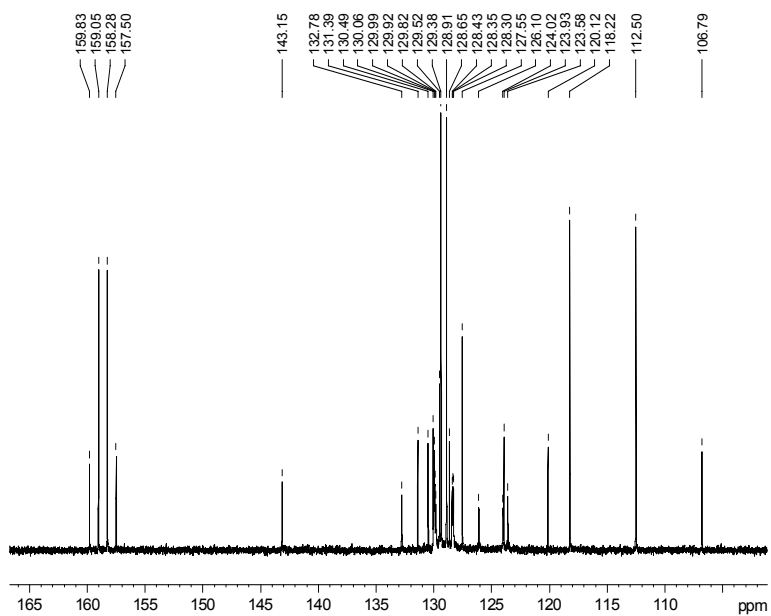



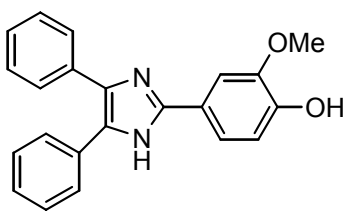

<sup>1</sup>H NMR

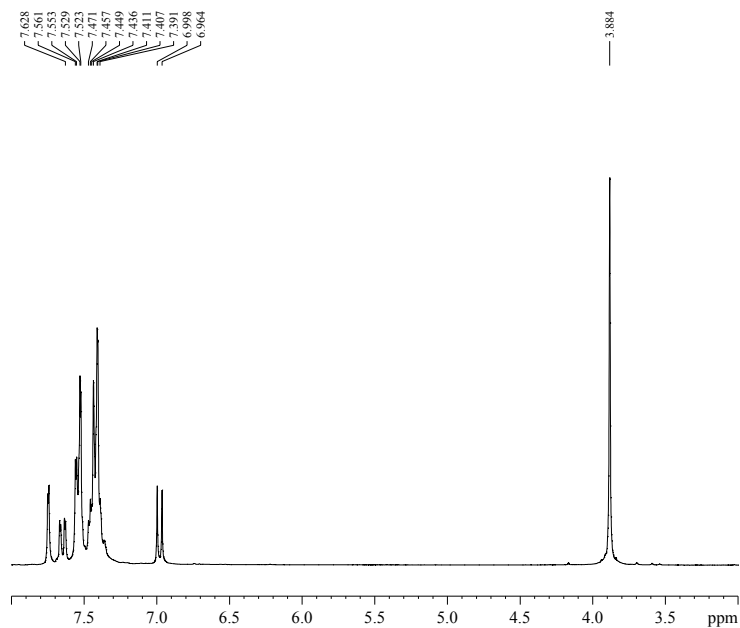

<sup>13</sup>C NMR

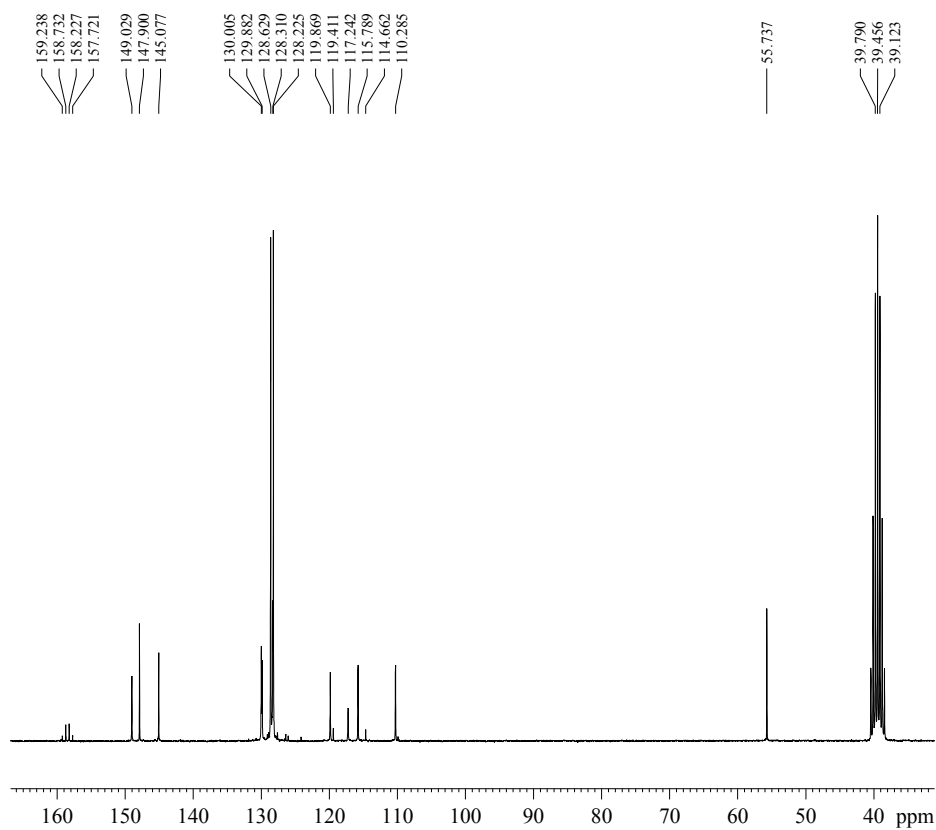

## Synthesis and characterization of a benzoxazole compound

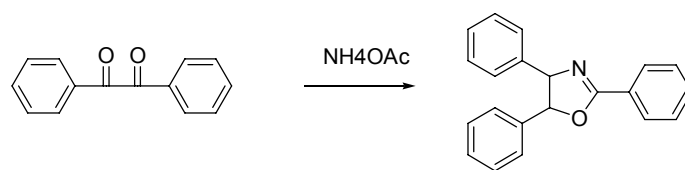

Benzil (1,8 g, 8,5 mmol) and ammonium acetate (6,6 g, 85 mmol) were suspended in 7,5 mL of water in a High pressure Teflon reactor equipped with a magnetic stir bar, a pressure sensor and an optical fibre. The reaction mixture was submitted to microwave irradiation in a Milestone Ethos multi-mode cavity at 800 W for 10 minutes. For security reasons, the maximum temperature allowed was set to 210°C and the maximum pressure was 25bars. After cooling, the crude product was isolated by simple filtration. This compound was further rinsed with ethanol and methanol. The different characterizations of this product are consistent with the following benzoxazole structure:

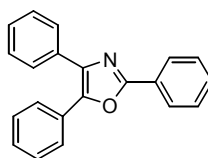

### <sup>1</sup>H NMR

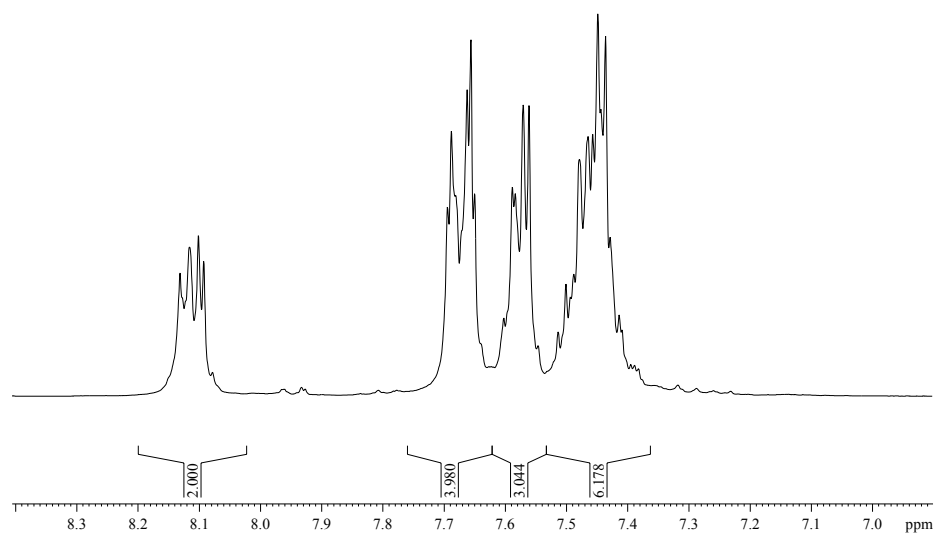

$^{13}\text{C}$  NMR

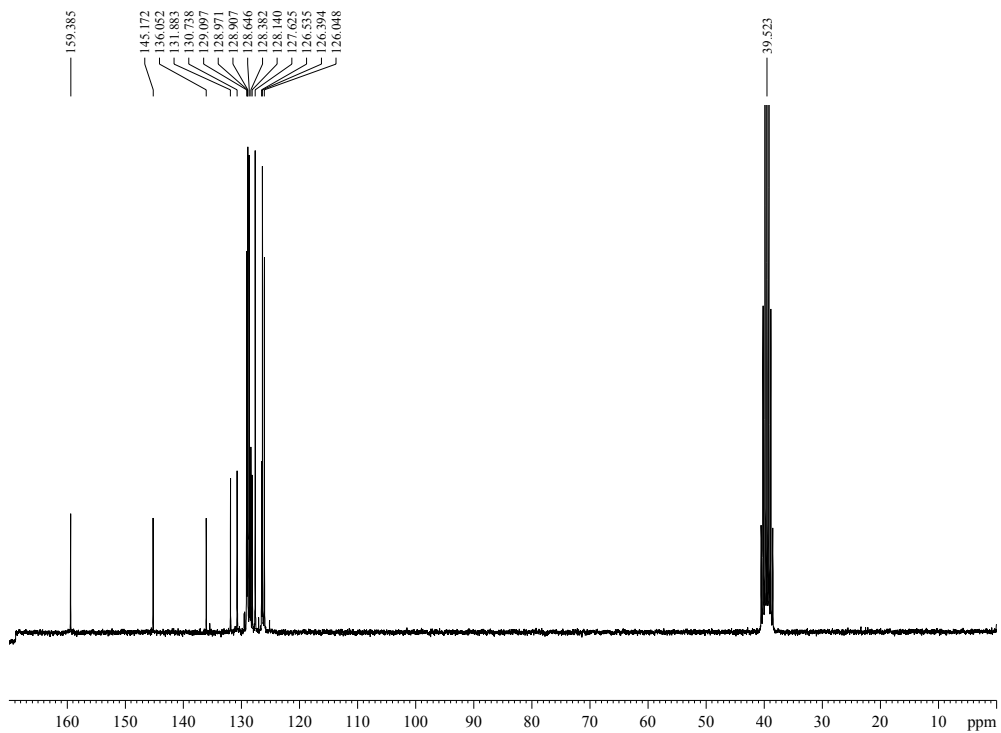

Zoom ( 120ppm -160 ppm) :

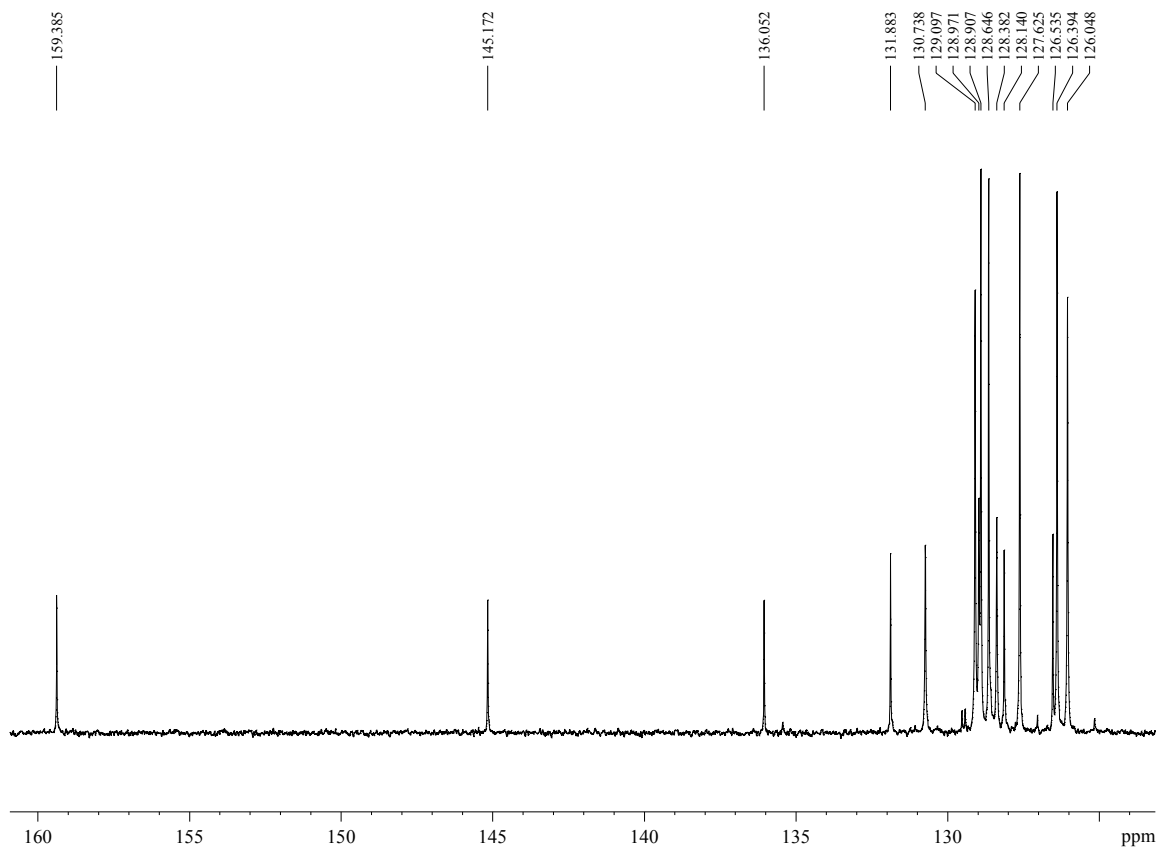

### Mass Spectrum

Abundance

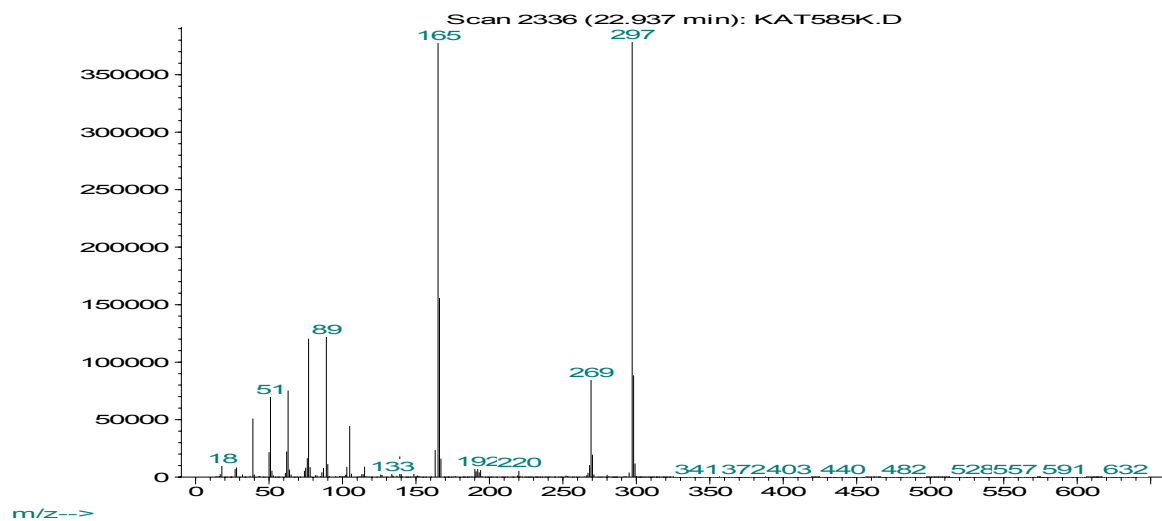

### HPLC UV trace (262 nm, 254 nm, 2880 nm)

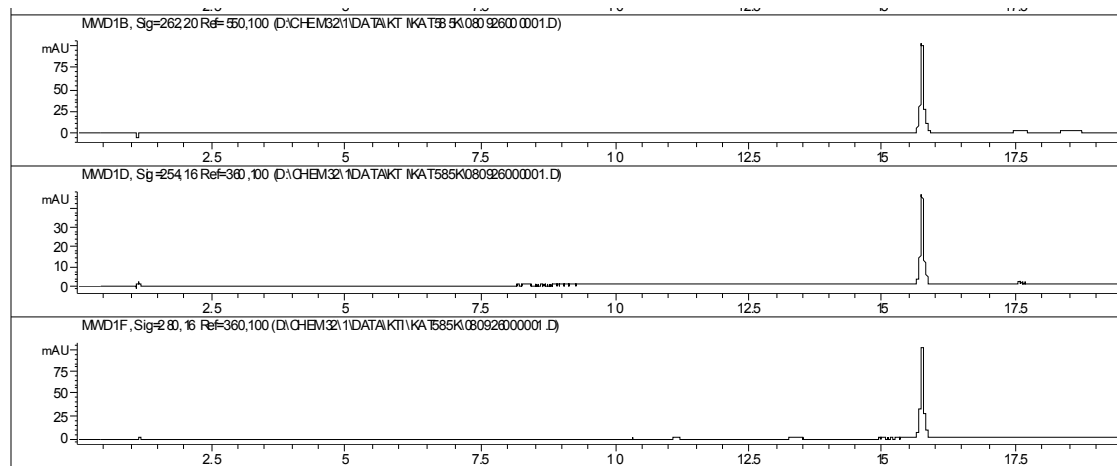

Supplement: b925177d.pdf [file b925177d.pdf]
